# Supplementary material for: Aircraft routing with minimal climate impact: the REACT4C climate cost function modelling approach (V1.0)
Source: Copernicus journal article supplement (doi:10.5194/gmd-7-175-2014), 2014-01-28
Supplement: Supplementary file 1 [file S_Ozone-perturbation.pdf › S_Ozone-perturbation.pdf]

## Supplementary Material to

Aircraft routing with minimal climate impact: The REACT4C cost function modelling approach V1.0

V. Grewe<sup>1</sup>, C. Frömming<sup>1</sup>, S. Matthes<sup>1</sup>, S. Brinkop<sup>1</sup>, M. Ponater<sup>1</sup>, S. Dietmüller<sup>1</sup>, P. Jöckel<sup>1</sup>, H. Garny<sup>1</sup>,  
E. Tsati<sup>1</sup>, O.A. Søvde<sup>2</sup>, J. Fuglestad<sup>2</sup>, G. Myhre<sup>2</sup>, K.P. Shine<sup>3</sup>, E. Irvine<sup>3</sup>, T. Champougny<sup>4</sup>, and  
P. Hullah<sup>5</sup>

<sup>1</sup>Deutsches Zentrum für Luft- und Raumfahrt, Institut für Physik der Atmosphäre, Oberpfaffenhofen, Germany

<sup>2</sup>Center for International Climate and Environmental Research Oslo (CICERO), Oslo, Norway

<sup>3</sup>Department of Meteorology, University of Reading, Reading, UK

<sup>4</sup>Eurocontrol Headquarter DNM/OPL, Brussels, Belgium

<sup>5</sup>Eurocontrol Experimental Centre, Bretigny, France

Figures:

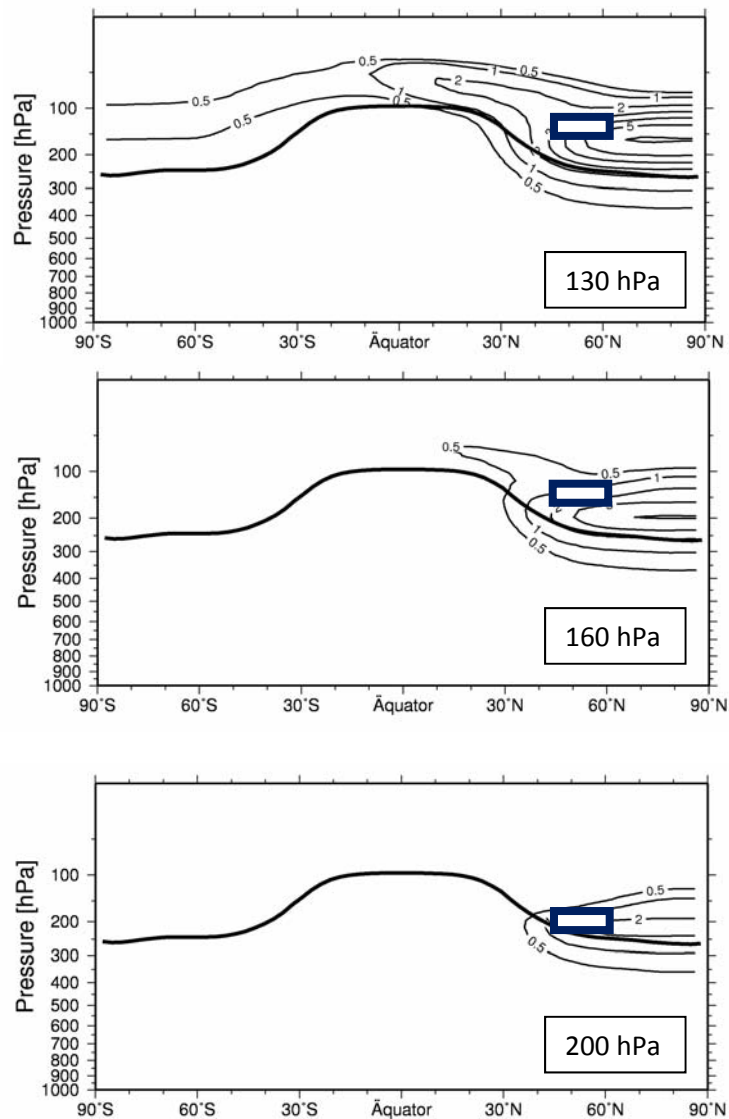

Figure S1: Ozone volume mixing perturbations [ppb] used as input for the calculation of the relation between instantaneous and adjusted radiative forcing. Data are based on Fichter (2009).

#### References:

Fichter, C., Climate impact of air traffic emissions in dependency of the emission location and altitude. Dissertation. DLR Forschungsbericht. DLR-FB-2009-22, 2009.
