# Supplementary material for: Aircraft routing with minimal climate impact: the REACT4C climate cost function modelling approach (V1.0)
Source: Copernicus journal article supplement (doi:10.5194/gmd-7-175-2014), 2014-01-28
Supplement: Supplementary file 4 [file S_airtrac_130730.pdf › S_airtrac_130730.pdf]

# Documentation of the EMAC submodels

## AIRTRAC 1.0 and CONTRAIL 1.0

Christine Frömming, Volker Grewe, Sabine Brinkop, and Patrick Jöckel  
Institut für Physik der Atmosphäre  
DLR-Oberpfaffenhofen

`christine.froemming@dlr.de; volker.grewe@dlr.de`

This manual is available as electronic supplement of our article  
“Aircraft routing with minimal climate impact:  
The REACT4C climate cost function modelling approach (V1.0)  
in Geosci. Model Dev. Disc. (2013),  
available at: <http://www.geosci-model-dev.net>.

July 2013

Contents

1 Introduction 3

2 The submodel AIRTRAC 3

2.1 General structure . . . . . 3

2.2 The subroutine `airtrac_integrate` . . . . . 4

2.3 Namelist . . . . . 4

3 The submodel CONTRAIL 4

3.1 General structure . . . . . 4

3.2 The subroutine `contrail_pot_cov` . . . . . 6

3.3 The subroutine `contrail_calc` . . . . . 6

3.4 The subroutine `contrail_calc_dev` . . . . . 7

3.5 The subroutine `contrail_spread` . . . . . 7

3.6 The subroutine `contrail_sedi` . . . . . 7

3.7 Namelist . . . . . 7

4 References 9

# 1 Introduction

This documentation provides an overview on the EMAC submodels **AIRTRAC** (Section 2) and **CONTRAIL** (Section 3). Within **AIRTRAC** the Lagrangian tracers are defined and the evolution of gaseous species caused by a local emission of  $\text{NO}_x$  and  $\text{H}_2\text{O}$  is simulated on trajectories. The emission location is defined via the submodel **TREXP**. Physics and chemistry is calculated based on the tagging contribution calculation, i.e. taking input from the submodels **MECCA**, **SCAV**, and **CLOUD** for reaction rates, wash out, and rain rates. The submodel **CONTRAIL** includes contrail formation and contrail processing in general and additionally from emissions at individual time-regions, which are defined via **AIRTRAC**. Each section is divided into a subsection describing the general structure (2.1 and 3.1), subroutines, which also includes a description of important variables (2.2 and 3.2), and namelists (2.3 and 3.7).

## 2 The submodel AIRTRAC

### 2.1 General structure

The structure of the submodel **AIRTRAC** follows the MESSY2 coupling standards (Jöckel et al., 2010).

| <i>Submodel Interface Layer</i>                                                                                                                                                                                                                                     | <i>Base Model Core Layer</i>                                                          |
|---------------------------------------------------------------------------------------------------------------------------------------------------------------------------------------------------------------------------------------------------------------------|---------------------------------------------------------------------------------------|
| <code>messy_airtrac_e5.f90</code>                                                                                                                                                                                                                                   | <code>messy_airtrac.f90</code>                                                        |
| <code>airtrac_initialize</code><br>Calls subroutines to read CTRL and CPL namelists                                                                                                                                                                                 |                                                                                       |
| <code>airtrac_read_nml_cpl</code><br>Reads coupling relevant parameters                                                                                                                                                                                             | <code>airtrac_read_nml_ctrl</code><br>Reads core relevant parameters                  |
| <code>airtrac_new_tracer</code><br>Defines Lagrangian tracers with <code>nlgtrac=13</code> properties for species and contrails                                                                                                                                     |                                                                                       |
| <code>airtrac_init_memory</code><br>Allocates memory (tendencies of Lagrangian tracers) and defines stream <b>AIRTRAC</b> with <code>ngptrac=29</code> grid point fields in Lagrangian representation plus additional scavenging and contrail information           |                                                                                       |
| <code>airtrac_init_coupling</code><br>Initialise coupling, makes information available from other submodels                                                                                                                                                         |                                                                                       |
| <code>airtrac_global_end</code><br>Transfers grid point fields to Lagrangian fields, defines start values for Lagrangian integration, checks whether emission takes place, calls core subroutine <code>airtrac_integrate</code> , and updates Lagrangian tendencies |                                                                                       |
|                                                                                                                                                                                                                                                                     | <code>airtrac_integrate</code><br>Calculates processes on trajectories (see Sec. 2.2) |
| <code>airtrac_free_memory</code><br>Release memory                                                                                                                                                                                                                  |                                                                                       |

## 2.2 The subroutine airtrac\_integrate

| ELEMENTAL SUBROUTINE airtrac_integrate (vars)                                                     |          |        |                                                                                                                                                                                                                                                                                                                                                                           |
|---------------------------------------------------------------------------------------------------|----------|--------|---------------------------------------------------------------------------------------------------------------------------------------------------------------------------------------------------------------------------------------------------------------------------------------------------------------------------------------------------------------------------|
| name                                                                                              | type     | intent | description                                                                                                                                                                                                                                                                                                                                                               |
| <b>mandatory arguments:</b>                                                                       |          |        |                                                                                                                                                                                                                                                                                                                                                                           |
| <u>General information</u>                                                                        |          |        |                                                                                                                                                                                                                                                                                                                                                                           |
| dt                                                                                                | REAL(DP) | IN     | time step in seconds                                                                                                                                                                                                                                                                                                                                                      |
| <u>Background tracer information from MECCA (converted from grid space to lagrangian tracers)</u> |          |        |                                                                                                                                                                                                                                                                                                                                                                           |
| X_lg,                                                                                             | REAL(DP) | IN     | background mixing ratio of species $X$ in [mol/mol]; $X \in \{\text{NO}, \text{NO}_2, \text{HNO}_3, \text{OH}, \text{HO}_2\}$                                                                                                                                                                                                                                             |
| X_lg_te                                                                                           | REAL(DP) | IN     | chemical tendencies of background species from individual chemical reactions or groups of reactions in [mol/mol/s]; $X \in \{\text{O}_3\text{ProdN}, \text{O}_3\text{LossN}, \text{O}_3\text{LossY}, \text{NO}_x\text{Loss}, \text{OHProd}i, \text{OHLoss}j, \text{HO}_2\text{Prod}1, \text{HO}_2\text{Loss}1, \text{HO}_2\text{Loss}2\}$ ; $i=1,\dots,3$ ; $j=1,\dots,5$ |
| HNO3Loss_lg_te                                                                                    | REAL(DP) | IN     | tendencies of background HNO <sub>3</sub> due to scavenging in mol/mol/s                                                                                                                                                                                                                                                                                                  |
| h2o_lg                                                                                            | REAL(DP) | IN     | water vapour in [mol/mol]                                                                                                                                                                                                                                                                                                                                                 |
| h2o_loss_lg                                                                                       | REAL(DP) | IN     | water vapour loss in [mol/mol/s]                                                                                                                                                                                                                                                                                                                                          |
| <u>AIRTRAC specific information</u>                                                               |          |        |                                                                                                                                                                                                                                                                                                                                                                           |
| X_air_lg                                                                                          | REAL(DP) | INOUT  | mixing ratio of $X$ due to an emission in a time-region in [mol/mol]; $X \in \{\text{NO}_x, \text{O}_3, \text{HNO}_3, \text{OH}, \text{HO}_2, \text{H}_2\text{O}, \text{CH}_4\}$                                                                                                                                                                                          |
| X_air_lg_te                                                                                       | REAL(DP) | OUT    | tracer tendencies due to emissions in time-regions in [mol/mol/s]; $X \in \{\text{NO}_x, \text{O}_3, \text{HNO}_3, \text{OH}, \text{HO}_2, \text{H}_2\text{O}, \text{CH}_4\}$                                                                                                                                                                                             |
| X_air_lg_te                                                                                       | REAL(DP) | OUT    | chemical tendencies of species due to individual reaction (families) in [mol/mol/s]; $X \in \{\text{O}_3\text{ProdN}, \text{O}_3\text{LossN}, \text{O}_3\text{LossY}, \text{NO}_x\text{Loss}, \text{HNO}_3\text{loss}, \text{HNO}_3\text{scav}\}$                                                                                                                         |
| hno3scav_air_lg_te                                                                                | REAL(DP) | OUT    | Scavenging of emitted N-compounds [mol/mol/s]                                                                                                                                                                                                                                                                                                                             |

Note that the dimension of  $X_{\text{air\_lg\_te}}$  is `nlgtrac=13`.

## 2.3 Namelist

The AIRTRAC submodel has a control namelist, only:

```
!  -- f90 --
&CTRL
N_emis_points=15
/
```

The variable

- `n_emis_points` is an integer, which defines the number of emission time-regions. The emission locations are defined via `TREXP`.

## 3 The submodel CONTRAIL

### 3.1 General structure

The structure of the submodel CONTRAIL follows the MESSY2 coupling standards (Jöckel et al., 2010).

| Submodel Interface Layer<br>messy_contrail_si.f90                                                                                                                                                                                          | Base Model Core Layer<br>messy_contrail.f90                                                                                                                                                                                                                                                          |
|--------------------------------------------------------------------------------------------------------------------------------------------------------------------------------------------------------------------------------------------|------------------------------------------------------------------------------------------------------------------------------------------------------------------------------------------------------------------------------------------------------------------------------------------------------|
| <b>contrail_initialize</b><br>Reads CTRL and CPL namelist and assigns emission fields                                                                                                                                                      |                                                                                                                                                                                                                                                                                                      |
| <b>contrail_read_nml_cpl</b><br>Reads coupling information for critical humidity for cloud condensation and emissions                                                                                                                      | <b>contrail_read_nml_ctrl</b><br>Reads core relevant parameters for fuel, aircraft and contrail parameterization                                                                                                                                                                                     |
| <b>contrail_init_memory</b><br>Defines stream <b>contrail</b> with GP and LG potential contrail coverage fields and actual contrail coverage, and contrail properties such as ice water path, for every time-region and for both GP and LG |                                                                                                                                                                                                                                                                                                      |
| <b>contrail_init_coupling</b><br>Initialise coupling, makes cloud information available from other submodels                                                                                                                               |                                                                                                                                                                                                                                                                                                      |
| <b>contrail_physc</b><br>Calls subroutine <b>contrail_pot_cov</b> for GP and <b>contrail_calc</b> for every time-region emission and emission inventory in the GP                                                                          | <b>contrail_pot_cov</b><br>Calculates potential contrail coverage                                                                                                                                                                                                                                    |
|                                                                                                                                                                                                                                            | <b>contrail_calc</b><br>Calculates actual contrail coverage                                                                                                                                                                                                                                          |
| <b>contrail_global_end</b><br>Calls subroutine <b>contrail_pot_cov</b> and <b>contrail_uv_grad</b> for LG. For every time-region emission and emission inventory ( <b>contrail_calc_dev</b> ) is called.                                   | <b>contrail_pot_cov</b> see above                                                                                                                                                                                                                                                                    |
|                                                                                                                                                                                                                                            | <b>contrail_uv_grad</b><br>Calculates wind shear                                                                                                                                                                                                                                                     |
|                                                                                                                                                                                                                                            | <b>contrail_calc_dev</b><br>Calculates development of actual contrail coverage and contrail ice water ( <b>contrail_calc</b> see above), water vapour uptake, sublimation and growth of contrail particles, contrail spreading ( <b>contrail_spread</b> ) and sedimentation ( <b>contrail_sedi</b> ) |
|                                                                                                                                                                                                                                            | <b>contrail_calc</b> see above                                                                                                                                                                                                                                                                       |
|                                                                                                                                                                                                                                            | <b>contrail_spread</b><br>Calculates contrail spreading based on wind shear                                                                                                                                                                                                                          |
|                                                                                                                                                                                                                                            | <b>contrail_sedi</b><br>Calculates sedimentation of ice particles                                                                                                                                                                                                                                    |
| <b>contrail_free_memory</b><br>Release memory                                                                                                                                                                                              |                                                                                                                                                                                                                                                                                                      |

### 3.2 The subroutine contrail\_pot\_cov

| ELEMENTAL SUBROUTINE contrail_pot_conv (T,p,q,zqte,b_ci,zrhc,dt,b_cc,potcov,zqsm1,zconpn |          |        |                                                                       |
|------------------------------------------------------------------------------------------|----------|--------|-----------------------------------------------------------------------|
| name                                                                                     | type     | intent | description                                                           |
| <b>mandatory arguments:</b>                                                              |          |        |                                                                       |
| T                                                                                        | REAL(DP) | IN     | temperature [K]                                                       |
| p                                                                                        | REAL(DP) | IN     | pressure [Pa]                                                         |
| q                                                                                        | REAL(DP) | IN     | water vapour [kg/kg]                                                  |
| zqte                                                                                     | REAL(DP) | IN     | water vapour tendency [kg/kg/s]                                       |
| b_ci                                                                                     | REAL(DP) | IN     | cloud cover [fraction]                                                |
| zrhc                                                                                     | REAL(DP) | IN     | critical humidity for nat. clouds [kg/kg]                             |
| dt                                                                                       | REAL(DP) | IN     | time step length [s]                                                  |
| b_cc                                                                                     | REAL(DP) | OUT    | potential contrail cirrus coverage = ISS (contrail+cirrus) [fraction] |
| potcov                                                                                   | REAL(DP) | OUT    | potential persistent contrail cirrus coverage [fraction]              |
| zqsm1                                                                                    | REAL(DP) | OUT    | Diagnostic output: saturation water vapour mixing ratio [kg/kg]       |
| zconpn                                                                                   | REAL(DP) | OUT    | Water vapour condensate within this timestep [kg/kg]                  |

### 3.3 The subroutine contrail\_calc

| ELEMENTAL SUBROUTINE contrail_calc (q, b_ci, zconrat, potcov, zconpn, emis, scal,pconcov, pconiwc) |          |        |                                                                                                 |
|----------------------------------------------------------------------------------------------------|----------|--------|-------------------------------------------------------------------------------------------------|
| name                                                                                               | type     | intent | description                                                                                     |
| <b>mandatory arguments:</b>                                                                        |          |        |                                                                                                 |
| q                                                                                                  | REAL(DP) | IN     | water vapour [kg/kg]                                                                            |
| b_ci                                                                                               | REAL(DP) | IN     | cloud cover [fraction]                                                                          |
| zconrat                                                                                            | REAL(DP) | IN     | condensated water vapour within this timestep (=rate from cloud) [kg/kg]                        |
| potcov                                                                                             | REAL(DP) | IN     | potential persistent contrail cirrus coverage [fraction]                                        |
| zconpn                                                                                             | REAL(DP) | IN     | water vapour condensate within this timestep [kg/kg]                                            |
| emis                                                                                               | REAL(DP) | IN     | emission of water vapour [kg/kg/s]                                                              |
| scal                                                                                               | REAL(DP) | IN     | scaling factor, if necessary, for actual contrail coverage to adjust to observations [unitless] |
| pconcov                                                                                            | REAL(DP) | OUT    | contrail-cirrus coverage [fraction]                                                             |
| pconiwc                                                                                            | REAL(DP) | OUT    | contrail-cirrus ice water content [kg/kg]                                                       |

### 3.4 The subroutine contrail\_calc\_dev

| ELEMENTAL SUBROUTINE contrail_calc_dev (vars) |          |        |                                                                                  |
|-----------------------------------------------|----------|--------|----------------------------------------------------------------------------------|
| name                                          | type     | intent | description                                                                      |
| <b>mandatory arguments:</b>                   |          |        |                                                                                  |
| q                                             | REAL(DP) | IN     | water vapour [kg/kg]                                                             |
| b_ci                                          | REAL(DP) | IN     | cloud cover [fraction]                                                           |
| zconrat                                       | REAL(DP) | IN     | condensated water vapour within this timestep (=rate from cloud) [kg/kg]         |
| potcov                                        | REAL(DP) | IN     | potential persistent contrail cirrus coverage [fraction]                         |
| zconpn                                        | REAL(DP) | IN     | water vapour condensate within this timestep [kg/kg]                             |
| dt                                            | REAL(DP) | IN     | time step [s]                                                                    |
| emis                                          | REAL(DP) | IN     | emission of water vapour [kg/kg/s]                                               |
| scal                                          | REAL(DP) | IN     | scaling factor for [unitless]                                                    |
| potcov_m1                                     | REAL(DP) | IN     | potential persistent contrail cirrus coverage at t-1 [fraction]                  |
| pconcov_m1                                    | REAL(DP) | IN     | contrail-cirrus coverage at t-1 [fraction]                                       |
| pconiw_m1                                     | REAL(DP) | IN     | contrail-cirrus ice water content at t-1 [kg/kg]                                 |
| rho                                           | REAL(DP) | IN     | density [kg/m <sup>3</sup> ]                                                     |
| eta_dot                                       | REAL(DP) | IN     | vertical velocity in hybrid coordinates [1/s]                                    |
| dudz                                          | REAL(DP) | IN     | zonal wind shear [1/s]                                                           |
| dvdz                                          | REAL(DP) | IN     | meridional wind shear [1/s]                                                      |
| pconcov_sum                                   | REAL(DP) | OUT    | contrail coverage of "sum" of aged plus act. contribution [fraction]             |
| pconiw_sum                                    | REAL(DP) | OUT    | ice water content of contrails of "sum" of aged plus actual contribution [kg/kg] |
| pconcov_now                                   | REAL(DP) | OUT    | contrail coverage from emissions at this time step [fraction]                    |
| pconiw_now                                    | REAL(DP) | OUT    | ice water content of contrails from emissions at this time step [kg/kg]          |
| concov_te_spread                              | REAL(DP) | OUT    | tendency of pconcov_sum due to spreading [fraction/s]                            |
| coniw_te_sedi                                 | REAL(DP) | OUT    | tendency of pconiw_sum due to sedimentation [kg/kg/s]                            |
| coniw_te_pot                                  | REAL(DP) | OUT    | tendency of pconiw_sum due to growth [kg/kg/s]                                   |

### 3.5 The subroutine contrail\_spread

| ELEMENTAL SUBROUTINE contrail_spread (concov_te_spread,dudz,dvdz,zconcov_m1,gboxarea) |          |        |                                                           |
|---------------------------------------------------------------------------------------|----------|--------|-----------------------------------------------------------|
| name                                                                                  | type     | intent | description                                               |
| <b>mandatory arguments:</b>                                                           |          |        |                                                           |
| concov_te_spread                                                                      | REAL(DP) | OUT    | change in contrail coverage due to spreading [fraction/s] |
| dudz                                                                                  | REAL(DP) | IN     | zonal wind shear [1/s]                                    |
| dvdz                                                                                  | REAL(DP) | IN     | meridional wind shear [1/s]                               |
| zconcov_m1                                                                            | REAL(DP) | IN     | contrail-cirrus coverage at t-1 [fraction]                |
| gboxarea                                                                              | REAL(DP) | IN     | grid box area [m <sup>2</sup> ]                           |

### 3.6 The subroutine contrail\_sedi

| ELEMENTAL SUBROUTINE contrail_sedi (lwi_lg, rho_lg, w_wind, lwi_lg_tte) |          |        |                                                |
|-------------------------------------------------------------------------|----------|--------|------------------------------------------------|
| name                                                                    | type     | intent | description                                    |
| <b>mandatory arguments:</b>                                             |          |        |                                                |
| lwi_lg                                                                  | REAL(DP) | IN     | ice water content [kg/kg]                      |
| rho_lg                                                                  | REAL(DP) | IN     | air density [kg/m <sup>3</sup> ]               |
| w_wind                                                                  | REAL(DP) | IN     | vertical velocity in hybrid coordinates [1/s]  |
| lwi_lg_tte                                                              | REAL(DP) | OUT    | tendency of lwi due to sedimentation [kg/kg/s] |

### 3.7 Namelist

The CONTRAIL submodel has a control and a coupling namelist:

```
!  -*- f90 -*-
&CTRL
! Water vapour emission index
EI_H2O = 1.25 ! [kg(H2O)/kg(fuel)]
! Combustion heat of fuel
Q_fuel = 43.2e6 ! [J/kg] (Schumann et al., 2000)
```

```

! overall propulsion efficiency of aircraft
eta_ac = 0.31 ! [fraction] (Schumann et al., 2000)
! see Burkhardt et al., 2008:
a_sac = 0.9,
r_sac = 1.1,
!
/

&CPL
! -----
! GRID-POINT
! -----
L_GP = .TRUE.
r_scal_gp = 1.0, ! scaling factor for contrail coverage
!
! critical humidity for cloud condensation
C_GP_CLOUD_CRIT = 'cloud', 'rhc',
! cloud condensate
C_GP_CLOUD_COND = 'cloud', 'condensation',
!
!C_GP_EMIT(1) = 'import_rgt','airc_quantify',
!C_GP_EMIT(2) = 'import_rgt','airc_react4c',
! ...
! -----
! LAGRANGIAN
! -----
L_LG = .TRUE.
r_scal_lg = 1.0, ! scaling factor for contrail coverage
L_LG_DIAG_TEND = .TRUE.
!
! critical humidity for cloud condensation
C_LG_CLOUD_CRIT = 'lggp_lg', 'rhc',
! cloud condensate
C_LG_CLOUD_COND = 'lggp_lg', 'condensation',
!
!C_LG_EMIT(1) = 'airtrac','emis_001',
!C_LG_EMIT(2) = 'airtrac','emis_002',
! ...
!
/

```

The control (CTRL) namelist has the following variables:

- `EI_H2O = 1.25` is the emission index  $[\text{kg}(\text{H}_2\text{O})/\text{kg}/\text{fuel}]$ .
- `Q_fuel = 43.2e6` is the combustion heat of the fuel  $[\text{J}/\text{kg}]$ .
- `eta_ac = 0.31` is the overall propulsion efficiency of the aircraft, i.e. the fraction of the chemical energy, which is used for the propulsion [fraction].
- `a_sac = 0.9` and `r_sac = 1.1` are parameters in the contrail parameterisation.

The coupling (CPL) namelist has two sets of variables for the grid point (GP) and lagrangian (LG) space. The potential contrail coverage and actual contrail coverage can be calculated for the GP an LG case independently and hence there are two sets of identical parameters.

- `L_GP = .TRUE.` is a logical switch, which controls whether contrails are calculated in the grid space.
- `r_scal_gp = 1.0` is a global scaling factor for the actual contrail coverage, calculated in the grid space.



- `C_GP_CLOUD_CRIT = 'cloud', 'rhc'` is a two dimensional string array, where the first string gives the channel name and the second the name of the channel object, which defines the critical humidity for cloud condensation for the calculation of the potential contrail coverage in the grid point space. See also `zrhc` in subroutine `contrail_pot_conv`.
- `C_GP_CLOUD_COND = 'cloud', 'condensation'` is a two dimensional string array, where the first string gives the channel name and the second the name of the channel object, which defines the cloud condensate. See also `zconrat` in subroutine `contrail_calc`.
- `C_GP_EMIS(i) = 'import_rgt', 'airc_quantify'` is a two dimensional string array for every `i`, where the first string gives the channel name and the second the name of the channel object, which defines the emission dataset.
- `LLG = .TRUE.` is a logical switch, which controls whether contrails are calculated in the Lagrangian space.
- `r_scal_lg = 1.0` is a global scaling factor for the actual contrail coverage, calculated in the Lagrangian space.
- `C_LG_CLOUD_CRIT = 'lggp_lg', 'rhc'` is a two dimensional string array, where the first string gives the channel name and the second the name of the channel object, which defines the critical humidity for cloud condensation for the calculation of the potential contrail coverage in the Lagrangian space. See also `zrhc` in subroutine `contrail_pot_conv`.
- `C_LG_CLOUD_COND = 'lggp_lg', 'condensation'` is a two dimensional string array, where the first string gives the channel name and the second the name of the channel object, which defines the cloud condensate. See also `zconrat` in subroutine `contrail_calc`.
- `C_LG_EMIS(i) = 'import_rgt', 'airc_quantify'` is a two dimensional string array for every `i`, where the first string gives the channel name and the second the name of the channel object, which defines the emission dataset.
- `LLG_DIAG_TEND` is a logical switch, which controls the output of additional diagnostics for Lagrangian calculation, only.

## 4 References

Jöckel, P., Kerkweg, A., Pozzer, A., Sander, R., Tost, H., Riede, H., Baumgaertner, A., Gromov, S., and Kern, B.: Development cycle 2 of the Modular Earth Submodel System (MESSy2), *Geosci. Model Dev.*, 3, 717-752, doi:10.5194/gmd-3-717-2010, 2010.
