# Supplementary material for: Aircraft routing with minimal climate impact: the REACT4C climate cost function modelling approach (V1.0)
Source: Copernicus journal article supplement (doi:10.5194/gmd-7-175-2014), 2014-01-28
Supplement: Supplementary file 5 [file S_costfunctions_metrics.pdf › S_costfunctions_metrics.pdf]

# REACT4C – Cost functions

Ole Amund Søvde

Center for International Climate and Environmental Research - Oslo (CICERO), Oslo, Norway

May 10, 2013

## 1 Cost functions – metrics

AGWP and AGTP for a species  $x$  are defined as:

$$AGWP_x = \int_0^H F_x(t) dt \quad (1)$$

$$AGTP_x = \int_0^H F_x(t) R(H-t) dt \quad (2)$$

where  $F_x(t)$  is the forcing and  $R(H-t)$  is the response function given by Eqn. (A2) in Fuglestad et al. (2010) (F2010 from now):

$$R(\xi) = \sum_{j=1}^2 \frac{c_j}{d_j} \exp\left(\frac{-\xi}{d_j}\right) \quad (3)$$

The forcing put out from the model is adjusted to annual mean, i.e. integrated forcing of the pulse emission. In essence, this is AGWP for the time period integrated over. To calculate AGWP and AGTP for different time horizons, we assume the forcing to be a pulse of amplitude  $A_x$ , with an exponential lifetime  $\tau_x$ . The annual mean radiative forcing  $\overline{F_x}$  is then:

$$\overline{F_x} = \int_0^1 A_x \exp\left(-\frac{t}{\tau_x}\right) dt \quad (4)$$

$$= A_x \tau_x \left[1 - \exp\left(-\frac{1}{\tau_x}\right)\right] \quad (5)$$

From this we find the assumed initial pulse  $A_x$ .

### 1.1 AIC

For AIC, with a short response lifetime  $\tau_{aic}$ , we get from Eqn. 5:

$$A_{aic} = \frac{\overline{F_{aic}}}{\tau_{aic} \left(1 - e^{-\frac{1}{\tau_{aic}}}\right)} \approx \frac{\overline{F_{aic}}}{\tau_{aic}} \quad (6)$$

Having the pulse  $A_{aic}$  and its exponential decay rate, we have the forcing as a function of time:

$$F_{aic}(t) = A_{aic} e^{-\frac{t}{\tau_{aic}}} \quad (7)$$

and we calculate AGWP using Eqn. (1):

$$AGWP_{aic} = \int_0^H F_{aic}(t) dt \quad (8)$$

$$= A_{aic} \tau_{aic} \left(1 - e^{-\frac{H}{\tau_{aic}}}\right) \quad (9)$$

AGTP is defined by Eqn. (2), and solving for this using Eqn. (7) and Eqn. (3), we get Eqn. (A4) in F2010:

$$AGTP_{aic} = \sum_{j=1}^2 \frac{A_{aic} \tau_{aic} c_j}{\tau_{aic} - d_j} \left(e^{-\frac{H}{\tau_{aic}}} - e^{-\frac{H}{d_j}}\right) \quad (10)$$

### 1.2 O<sub>3</sub> – short-lived

From the model we also have O<sub>3</sub> annual mean forcing, i.e. integrated forcing for one year. In general, the short-lived O<sub>3</sub> response reaches maximum after a certain time  $\varepsilon$ , and then decays. We consider two possibilities:

1. Approximate by assuming an instant peak of  $A_{O_3}$ , then decay according to lifetime.
2. Exponential increase  $\left(\frac{1-e^{-t/b}}{1-e^{-\varepsilon/b}}\right)$  until  $t = \varepsilon$ , with maximum  $A_y$ , followed by decay according to lifetime.

The two options will give slightly different  $F_{O_3}(t)$ , but as we will show, option 1 is a good approximation because most of the signal occurs during the first year.

#### option 1

Assuming  $F_{O_3}(t)$  decaying exponentially from  $A_{O_3}$ , we get:

$$F_{O_3}(t) = A_{O_3} e^{-\frac{t}{\tau_{O_3}}} \quad (11)$$

And similarly to AIC in Eqn. (6), we get from the integrated forcing  $\overline{F_{O_3}}$  for the first year:

$$A_{O_3} = \frac{\overline{F_{O_3}}}{\tau_{O_3} \left(1 - e^{-\frac{1}{\tau_{O_3}}}\right)} \approx \frac{\overline{F_{O_3}}}{\tau_{O_3}} \quad (12)$$

#### option 2

The second option – assuming a delay in the forcing peak, requires knowledge of when the peak occurred. Our test assumption is that the signal rises from zero to  $A_y$  at  $t = \varepsilon$  within the first year, as a function of  $1 - e^{t/b}$ :

$$F_{O_3,2}(t) = A_y \frac{1 - e^{-\frac{t}{b}}}{1 - e^{-\frac{\varepsilon}{b}}} \quad \text{for } 0 \leq t \leq \varepsilon \quad (13)$$

$$F_{O_3,2}(t) = A_y e^{-\frac{t}{\tau_{O_3}}} \quad \text{for } \varepsilon < t \quad (14)$$

We assume  $b = 0.025\varepsilon$ , so the response up to maximum is fairly quick, and integrate the forcing for 1 year, to

get  $\overline{F_{O3}}$ :

$$\begin{aligned}\overline{F_{O3}} &= \int_0^1 F_{O3,2}(t) dt \\ &= \frac{A_y}{1 - e^{-\frac{\varepsilon}{b}}} \int_0^\varepsilon 1 - e^{-\frac{t}{b}} dt \\ &\quad + A_y \int_\varepsilon^1 e^{-\frac{t}{\tau_{O3}}} dt\end{aligned}\quad (15)$$

$$\begin{aligned}&= \frac{A_y}{1 - e^{-\frac{\varepsilon}{b}}} \left[ t + b e^{-\frac{t}{b}} \right]_0^\varepsilon \\ &\quad - A_y \tau_{O3} \left[ e^{-\frac{t}{\tau_{O3}}} \right]_\varepsilon^1 \\ &= A_y \frac{(\varepsilon + b e^{-\frac{\varepsilon}{b}} - b)}{1 - e^{-\frac{\varepsilon}{b}}} \\ &\quad + A_y \tau_{O3} \left( e^{-\frac{\varepsilon}{\tau_{O3}}} - e^{-\frac{1}{\tau_{O3}}} \right)\end{aligned}\quad (16)$$

We solve Eqn. (16) for  $A_y$ :

$$A_y = \frac{\overline{F_{O3}}}{\frac{(\varepsilon + b e^{-\frac{\varepsilon}{b}} - b)}{1 - e^{-\frac{\varepsilon}{b}}} + \tau_{O3} \left( e^{-\frac{\varepsilon}{\tau_{O3}}} - e^{-\frac{1}{\tau_{O3}}} \right)} \quad (17)$$

#### Error estimates

The value of  $A_y$  could be considered “more correct” compared to our choice of  $A_{O3}$ . However, we want to show that the assumption of an instant peak of the latter is valid for the integral (i.e. area below the curve), so we integrate AGWP for  $H = 20$  years for both methods:

$$\begin{aligned}AGWP_1 &= \int_0^H A_{O3} e^{-\frac{t}{\tau_{O3}}} dt \\ &= A_{O3} \tau_{O3} (1 - e^{-\frac{H}{\tau_{O3}}})\end{aligned}\quad (18)$$

$$\begin{aligned}AGWP_2 &= \frac{A_y}{1 - e^{-\frac{\varepsilon}{b}}} \int_0^\varepsilon 1 - e^{-\frac{t}{b}} dt \\ &\quad + A_y \int_\varepsilon^H e^{-\frac{t}{\tau_{O3}}} dt\end{aligned}\quad (19)$$

$$\begin{aligned}&= A_y \frac{(\varepsilon + b e^{-\frac{\varepsilon}{b}} - b)}{1 - e^{-\frac{\varepsilon}{b}}} \\ &\quad + A_y \tau_{O3} \left( e^{-\frac{\varepsilon}{\tau_{O3}}} - e^{-\frac{H}{\tau_{O3}}} \right)\end{aligned}\quad (20)$$

Similarly, we integrate for AGTP:

$$\begin{aligned}AGTP_1 &= \int_0^H A_{O3} e^{-\frac{t}{\tau_{O3}}} R(H - t) dt \\ &= \sum_{j=1}^2 \frac{A_{O3} \tau_{O3} c_j}{\tau_{O3} - d_j} \left( e^{-\frac{H}{\tau_{O3}}} - e^{-\frac{H}{d_j}} \right)\end{aligned}$$

$$\begin{aligned}AGTP_2 &= \int_0^\varepsilon A_y \frac{1 - e^{-\frac{t}{b}}}{1 - e^{-\frac{\varepsilon}{b}}} R(H - t) dt \\ &\quad + \int_\varepsilon^H A_y e^{-\frac{t}{\tau_{O3}}} R(H - t) dt\end{aligned}\quad (21)$$

$$\begin{aligned}&= \sum_{j=1}^2 \frac{A_y c_j}{d_j (1 - e^{-\frac{\varepsilon}{b}})} \int_0^\varepsilon (1 - e^{-\frac{t}{b}}) e^{-\frac{H-t}{d_j}} dt \\ &\quad + \sum_{j=1}^2 \frac{A_y c_j}{d_j} \int_\varepsilon^H e^{-\frac{t}{\tau_{O3}}} e^{-\frac{H-t}{d_j}} dt\end{aligned}\quad (22)$$

Table 1: Error in option 1 vs option 2 for AGWP and AGTP for  $H = 20$  and  $b = 0.025\varepsilon$ .

| $\varepsilon$ | AGWP   | AGTP   |
|---------------|--------|--------|
| 1/12          | 0.08 % | -1.3 % |
| 2/12          | 0.31 % | -2.1 % |
| 3/12          | 0.57 % | -2.6 % |

$$\begin{aligned}&= \sum_{j=1}^2 \frac{A_y c_j}{d_j (1 - e^{-\frac{\varepsilon}{b}})} \cdot \\ &\quad \int_0^\varepsilon e^{-\frac{H-t}{d_j}} - e^{-t(\frac{1}{b} - \frac{1}{d_j}) - \frac{H}{d_j}} dt \\ &\quad + \sum_{j=1}^2 \frac{A_y c_j}{d_j} \int_\varepsilon^H e^{-t(\frac{1}{\tau_{O3}} - \frac{1}{d_j}) - \frac{H}{d_j}} dt \\ &= \sum_{j=1}^2 \frac{A_y c_j}{d_j (1 - e^{-\frac{\varepsilon}{b}})} \left[ d_j e^{-\frac{H-t}{d_j}} \right. \\ &\quad \left. - \frac{1}{\frac{1}{b} - \frac{1}{d_j}} e^{-t(\frac{1}{b} - \frac{1}{d_j}) - \frac{H}{d_j}} \right]_0^\varepsilon \\ &\quad + \sum_{j=1}^2 \frac{A_y c_j}{d_j} \left( \frac{-1}{\frac{1}{\tau_{O3}} - \frac{1}{d_j}} \right) \cdot \\ &\quad \left[ e^{-t(\frac{1}{\tau_{O3}} - \frac{1}{d_j}) - \frac{H}{d_j}} \right]_\varepsilon^H \\ &= \sum_{j=1}^2 \frac{A_y c_j}{1 - e^{-\frac{\varepsilon}{b}}} \left[ e^{-\frac{H-\varepsilon}{d_j}} - e^{-\frac{H}{d_j}} \right. \\ &\quad \left. + \frac{b}{b - d_j} \left( e^{-\varepsilon(\frac{1}{b} - \frac{1}{d_j}) - \frac{H}{d_j}} - e^{-\frac{H}{d_j}} \right) \right] \\ &\quad + \sum_{j=1}^2 \frac{A_y \tau_{O3} c_j}{\tau_{O3} - d_j} \cdot \\ &\quad \left( e^{-\frac{H}{\tau_{O3}}} - e^{-\varepsilon(\frac{1}{\tau_{O3}} - \frac{1}{d_j}) - \frac{H}{d_j}} \right)\end{aligned}$$

The error in option 1 compared to option 2 varies for the choice of  $\varepsilon$ , shown in Table 1 for time horizon  $H = 20$ .  $\overline{F_{O3}}$  is a factor in both  $A_{O3}$  and  $A_y$ , so its value does not matter for the percent error.

Withing 1-3 months the error in AGTP and AGWP is between 1-3%, which is small enough for our use.

### 1.3 H<sub>2</sub>O

The response lifetime for H<sub>2</sub>O is short, assumed to be 0.05 years, giving the same assumption as for AIC:

$$A_{H2O} = \frac{\overline{F_{H2O}}}{\tau_{H2O} \left( 1 - e^{-\frac{t}{\tau_{H2O}}} \right)} \approx \frac{\overline{F_{H2O}}}{\tau_{H2O}} \quad (23)$$

Having the pulse and its decay rate, we have the forcing as a function of time:

$$F_{H2O}(t) = A_{H2O} e^{-\frac{t}{\tau_{H2O}}} \quad (24)$$

and we calculate AGWP using Eqn. (1):

$$AGWP_{H2O} = \int_0^H F_{H2O}(t) dt$$

$$= A_{H_2O} \tau_{H_2O} \left(1 - e^{-\frac{H}{\tau_{H_2O}}}\right) \quad (25)$$

And AGTP:

$$AGTP = \int_0^H F_{H_2O}(t) R(H-t) dt \quad (26)$$

where  $R$  is the usual response function in Eqn. (3). Solving Eqn. (26) using Eqn. (24) and Eqn. (3), we get:

$$AGTP_{H_2O} = \sum_{j=1}^2 \frac{A_{H_2O} \tau_{H_2O} c_j}{\tau_{H_2O} - d_j} \left( e^{-\frac{H}{\tau_{H_2O}}} - e^{-\frac{H}{d_j}} \right) \quad (27)$$

## 1.4 CH<sub>4</sub>

CH<sub>4</sub> has a response time of about 12 years, hence differing substantially from the previous components. An emission of NO<sub>x</sub> produces a negative perturbation in CH<sub>4</sub> through increase in OH, and this perturbation reaches its minimum after a time  $H_0$ . From that point, the perturbation decays according to the response lifetime. From the model we have the integrated forcing up to  $H_0$  and the minimum RF ( $F_m$ ) at  $H_0$ .

For simplicity, we approximate the response from  $t = 0$  to  $t = H_0$  as a linear function, and after  $t = H_0$  as an exponential decay:

$$F_{CH_4}(t) = \frac{t}{H_0} F_m \quad \text{for } 0 \leq t \leq H_0 \quad (28)$$

$$F_{CH_4}(t) = F_m e^{-\frac{(t-H_0)}{\tau_{CH_4}}} \quad \text{for } H_0 < t$$

This can then be integrated to find AGWP and AGTP (in the following we simplify the notation by writing  $\tau$  for  $\tau_{CH_4}$ ):

$$\begin{aligned} AGWP_{CH_4} &= \int_0^H F_{CH_4}(t) dt \\ &= \int_0^{H_0} \frac{t}{H_0} F_m dt \\ &\quad + \int_{H_0}^H F_m e^{-\frac{(t-H_0)}{\tau}} dt \\ &= \frac{H_0}{2} F_m \\ &\quad + \tau F_m \left(1 - e^{-\frac{(H-H_0)}{\tau}}\right) \end{aligned} \quad (29)$$

$$\begin{aligned} AGTP_{CH_4} &= \int_0^H F_{CH_4}(t) R(H-t) dt \\ &= \int_0^{H_0} \frac{t}{H_0} F_m R(H-t) dt \\ &\quad + \int_{H_0}^H F_m e^{-\frac{(t-H_0)}{\tau}} R(H-t) dt \end{aligned} \quad (30)$$

and by inserting  $R$ , we get after re-arranging the integration and sums:

$$AGTP_{CH_4} = \sum_{j=1}^2 \frac{c_j}{d_j} \frac{F_m}{H_0} \int_0^{H_0} t e^{-\frac{(H-t)}{d_j}} dt$$

$$+ \sum_{j=1}^2 \frac{c_j}{d_j} F_m \int_{H_0}^H e^{-t(\frac{1}{\tau} - \frac{1}{d_j}) + \frac{H_0}{\tau} - \frac{H}{d_j}} dt$$

followed by partial integration of the first term and regular integration of the second term:

$$\begin{aligned} AGTP_{CH_4} &= \sum_{j=1}^2 \frac{c_j F_m}{d_j H_0} \cdot \\ &\quad \left| d_j t e^{-\frac{(H-t)}{d_j}} - d_j^2 e^{-\frac{(H-t)}{d_j}} \right|_0^{H_0} \\ &\quad + \sum_{j=1}^2 \frac{c_j F_m}{d_j} \frac{\tau d_j}{\tau - d_j} \cdot \\ &\quad \left| e^{-t(\frac{1}{\tau} - \frac{1}{d_j}) + \frac{H_0}{\tau} - \frac{H}{d_j}} \right|_{H_0}^H \\ &= \sum_{j=1}^2 \frac{c_j F_m}{H_0} \cdot \\ &\quad \left( (H_0 - d_j) e^{-\frac{(H-H_0)}{d_j}} + d_j e^{-\frac{H}{d_j}} \right) \\ &\quad + \sum_{j=1}^2 \frac{c_j F_m \tau}{\tau - d_j} \cdot \\ &\quad \left( e^{-\frac{(H-H_0)}{\tau}} - e^{-\frac{(H-H_0)}{d_j}} \right) \end{aligned}$$

In this work, we assume that the  $H_0 = 1$  year.

## 1.5 PMO

For PMO we assume  $F_{PMO} = 0.29 F_{CH_4}$ , hence we get:

$$AGWP_{PMO} = 0.29 AGWP_{CH_4} \quad (31)$$

$$AGTP_{PMO} = 0.29 AGTP_{CH_4} \quad (32)$$

## 1.6 CO<sub>2</sub>

CO<sub>2</sub> has a long lifetime, with specific forcing of  $A_{CO_2} = 1.82 \cdot 10^{-15} \text{ Wm}^{-2} \text{ kg}(\text{CO}_2)^{-1}$ . With the assumption of 3.16 kg(CO<sub>2</sub>) per kg(fuel), we get specific forcing of  $A_{CO_2} = 5.7512 \cdot 10^{-15} \text{ Wm}^{-2} \text{ kg}(\text{fuel})^{-1}$ . The time evolution of the response is given in Eqn. (A1) in F2010:

$$F_{CO_2}(t) = A_{CO_2} \left( a_0 + \sum_{i=1}^3 a_i e^{-\frac{t}{\alpha_i}} \right) \quad (33)$$

with the parameters

$$\begin{aligned} a_0 &= 0.217 \\ a_1 &= 0.259 \\ a_2 &= 0.338 \\ a_3 &= 0.186 \\ \alpha_1 &= 172.9 \\ \alpha_2 &= 18.51 \\ \alpha_3 &= 1.186 \end{aligned}$$

Integrating Eqn. (33) from  $t = 0$  to  $t = H$ , we get AGWP:

$$\begin{aligned}
 AGWP_{CO_2} &= F_{CO_2} \sum_{i=0}^3 d_i & (34) \\
 d_0 &= a_0 H \\
 d_1 &= a_1 \left(1 - e^{-\frac{H}{\alpha_1}}\right) \\
 d_2 &= a_2 \left(1 - e^{-\frac{H}{\alpha_2}}\right) \\
 d_3 &= a_3 \left(1 - e^{-\frac{H}{\alpha_3}}\right)
 \end{aligned}$$

AGTP is found by integrating Eqn. (2) using Eqn. (3) and Eqn. (33), which yields Eqn. (A3) in F2010:

$$\begin{aligned}
 AGTP_{CO_2} &= F_{CO_2} \left\{ \sum_{j=1}^2 a_o c_j \left(1 - e^{-\frac{H}{d_j}}\right) \right. & (35) \\
 &\quad \left. + \sum_{i=1}^3 \sum_{j=1}^2 \frac{a_i \alpha_i c_j}{\alpha_i - d_j} \left(e^{-\frac{H}{\alpha_i}} - e^{-\frac{H}{d_j}}\right) \right\}
 \end{aligned}$$

## References

Fuglestad, J. S., Shine, K. P., Berntsen, T., Cook, J., Lee, D. S., Stenke, A., Skeie, R. B., Velders, G. J. M., and Waitz, I. A.: Transport impacts on atmosphere and climate: Metrics, *Atm. Env.*, 44, 4648–4677, doi:10.1016/j.atmosenv.2009.04.044, 2010.
